# Supplementary material
Source: publisher figshare collection journal article supplement (https://tandf.figshare.com/articles/dataset/_/5929183)
Supplement: Supplementary file 1 [file 1]

## Single-graded CIGS with narrow bandgap for tandem solar cells

Thomas Feurer \*, Benjamin Bissig, Thomas Paul Weiss, Romain Carron, Enrico Avancini, Johannes Löckinger, Stephan Buecheler and Ayodhya N. Tiwari

*Laboratory for Thin Films and Photovoltaics, Empa - Swiss Federal Laboratories for Materials Science and Technology, Ueberlandstrasse 129, 8600 Duebendorf, Switzerland*

\*corresponding author: Thomas Feurer, [thomas.feurer@empa.ch](mailto:thomas.feurer@empa.ch)

### Acknowledgements:

Financial funding from the Swiss National Science Foundation (SNF)-NRP70, PV2050 (project NO.: 407040\_153976 and 407040\_153916), SNF-NanoTera and the Swiss Federal Office of Energy (SYNERGY: 20NA21\_150950), as well as the Competence Centre for Energy and Mobility (CCEM CONNECT-PV) are gratefully acknowledged.

### ORCID:

|                    |                     |
|--------------------|---------------------|
| Thomas Feurer      | 0000-0002-0281-0176 |
| Benjamin Bissig    | 0000-0001-9066-027X |
| Thomas P. Weiss    | 0000-0003-1823-4481 |
| Romain Carron      | 0000-0001-8281-4881 |
| Enrico Avancini    | 0                   |
| Johannes Löckinger | 0000-0002-8154-3511 |
| Stephan Buecheler  | 0                   |
| Ayodhya N. Tiwari  | 0                   |

# Single graded CIGS with low band gap for tandem solar cells

## Supplementary information

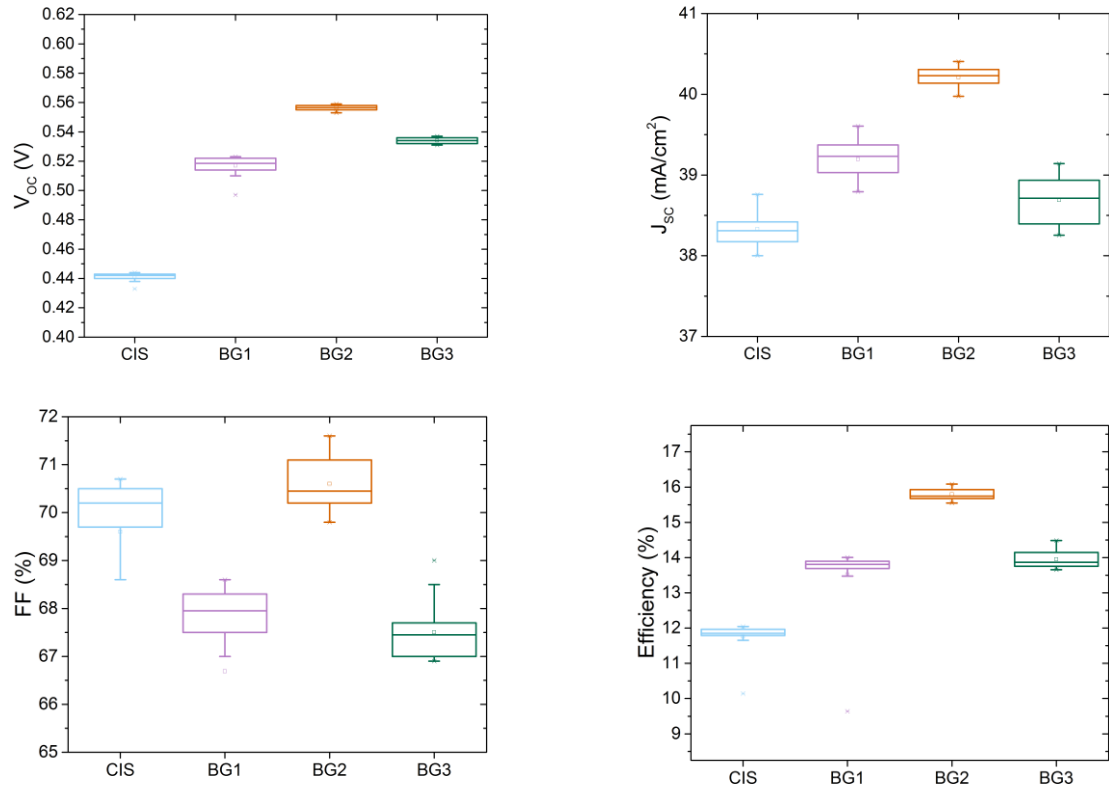

Supplementary Figure 1: JV- parameters of the samples with back grading in this work. Statistics over 18 cells each.

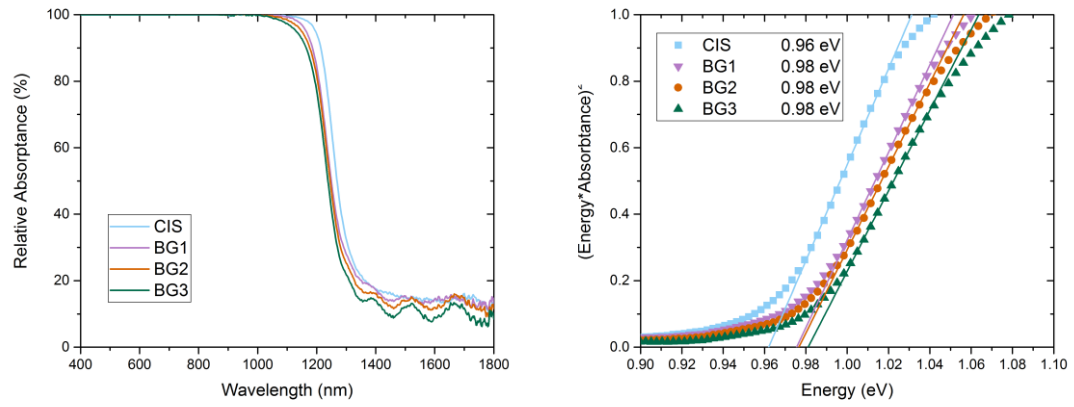

Supplementary Figure 2: Absorption of lifted of absorbers and representing bandgap extraction. The Absorption is extracted as  $1-T/(1-R)$ . The values do not reach 0 due to light-trapping inside the layer during the measurement.

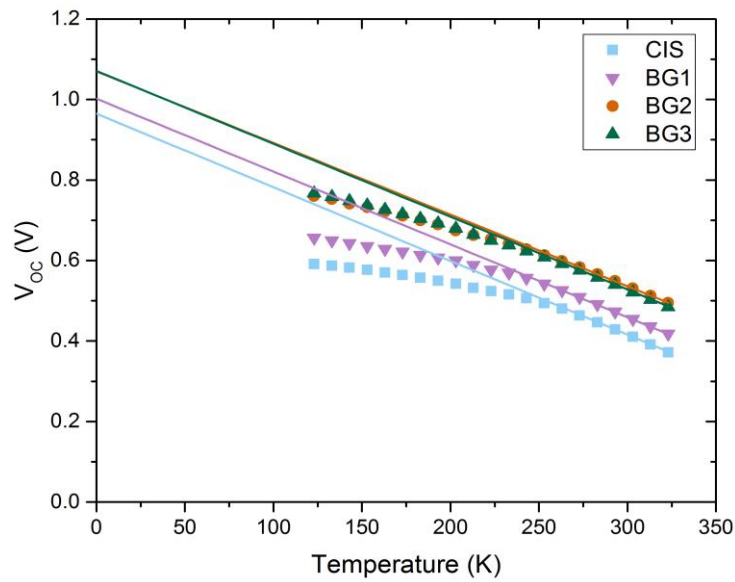

Supplementary Figure 3:  $V_{OC}$ -T plot for the cells investigated in this experiment. The extrapolation of the linear region gives activation energies below bandgap for the non- or only weakly graded cells

## Tables

*Supplementary Table 1:* Fitting results of the IV curves presented in Fig. 1 using a one-diode model including series and parallel resistances.  $R_{s_{\text{illu}}}$  and  $R_{p_{\text{illu}}}$  is fitted on the illuminated curve and averaged over 16 or more cells while  $R_{p_{\text{dark}}}$ ,  $J_0$  and  $A$  are fitted on the dark  $JV$  curve.

|            | <b>GGI</b> | <b><math>R_{s_{\text{illu}}}</math><br/>(<math>\Omega \text{ cm}^2</math>)</b> | <b><math>R_{p_{\text{illu}}}</math><br/>(<math>\Omega \text{ cm}^2</math>)</b> | <b><math>R_{p_{\text{dark}}}</math><br/>(<math>\Omega \text{ cm}^2</math>)</b> | <b><math>J_0</math><br/>(<math>\text{mA cm}^{-2}</math>)</b> | <b><math>A</math><br/>(-)</b> |
|------------|------------|--------------------------------------------------------------------------------|--------------------------------------------------------------------------------|--------------------------------------------------------------------------------|--------------------------------------------------------------|-------------------------------|
| <b>CIS</b> | 0.00       | 0.33                                                                           | 510                                                                            | 4600                                                                           | 2.05E-5                                                      | 1.24                          |
| <b>BG1</b> | 0.04       | 0.23                                                                           | 460                                                                            | 1600                                                                           | 4.71E-5                                                      | 1.54                          |
| <b>BG2</b> | 0.06       | 0.35                                                                           | 1240                                                                           | 2800                                                                           | 5.42E-5                                                      | 1.66                          |
| <b>BG3</b> | 0.09       | 0.23                                                                           | 530                                                                            | 2500                                                                           | 1.19E-4                                                      | 1.71                          |
